# Supplementary material for: Identifying sex-specific differences in the carotid revascularisation literature: findings from a scoping review
Source: HighWire-hosted journal article supplement (doi:10.1136/svn-2020-000744), 2021-03-29
Supplement: svn-2020-000744supp001_data_supplement.pdf [file svn-2020-000744supp001_data_supplement.pdf]

**SUPPLEMENTAL MATERIAL**

- Methods and Search Results
- Supplemental Figure 1: PRISMA Diagram
- Table I: MEDLINE Search Terms
- Table II: Full List of Included Studies
- Table III: Baseline Characteristics of Selected Studies
- References

## **Supplemental Methods and Search Results:**

### **Eligibility Criteria:**

Studies related to asymptomatic carotid stenosis, carotid artery occlusions or near-occlusions, were excluded. Meta-analysis or systematic reviews reporting individual patient data from RCTs were also included, however observational studies, case series, and reports were not included due to the elevated risk of bias associated with non-randomized data. We had no restrictions on country of study, ethnicity, sex, socio-economic status of study populations, or healthcare location of research. We only included studies presented in the English and French language.

### **Information Sources and Search:**

Supplementary searches included scanning the reference list of included studies and reviews identified through the primary search and ClinicalTrials.gov. The detailed search strategy using keywords and Medical Subject Headings (MeSH) terms is provided in Supplement Table I.

### **Study Selection:**

Screening and full-text review was conducted using Covidence Systematic Review software (Covidence, Melbourne, Australia). A two-stage screening was performed by two independent reviewers (OB and BD). In stage one, both abstracts and titles were screened for potentially relevant articles. In stage two, full-text screening was performed using a screening form created *a priori*. A liberal accelerated method was utilized, requiring two reviewers to exclude a study. A pilot screening exercise was performed at both levels, with 100 records piloted for level 1 and 25 records piloted at level 2. Disputes were resolved by author, MS.

### **Data Charting Process and Selected Items:**

Data extraction was conducted independently by each reviewer using an *a priori* collection form. We collected publication information, study population information, severity of ipsilateral carotid stenosis, type of ipsilateral event, treatment allocation, follow-up time, and outcome data.

### **Article Selection:**

Among the 1,537 records retrieved, title and abstract screening narrowed our search to 90 articles that underwent full text screening. Reasons for exclusion included: assessment of different outcome, alternate study designs, and lack of full-text availability (i.e. published abstracts). All included studies were peer-reviewed original research contributions using clinical trial data.

**Supplemental Figure 1: PRISMA Diagram**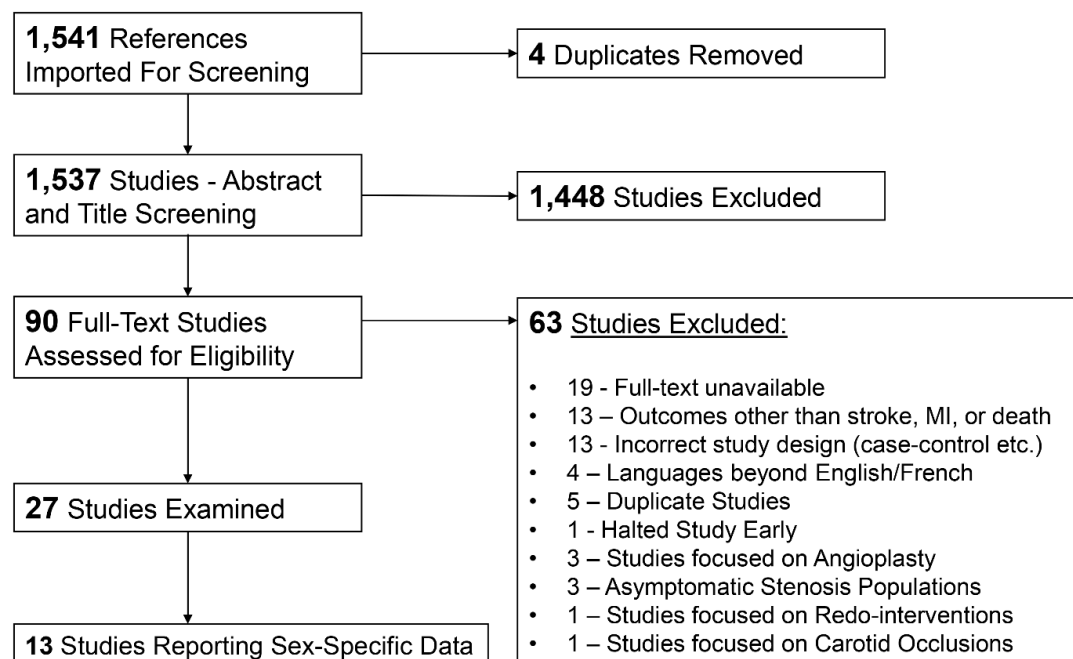

**Supplemental Table I: Sample Search Strategy**

1 Carotid Stenosis/ or carotid stenosis.kw.  
2 (carotid adj3 (stenos\$ or ulcer\$ or plaque\$ or narrow\$ or obstruct\$ or occlus\$ or constrict\$)).tw.  
3 1 or 2  
4 Endarterectomy, Carotid  
5 endarterectom\*.tw,kw.  
6 STENTS/ or stent\*.tw,kw.  
7 carotid revascularization.tw,kw.  
8 or/4-7  
9 3 and 8  
10 WOMEN  
11 Sex Characteristics  
12 sex factors  
13 (female or women).tw  
14 (sex or gender or women or female).ti.  
15 (gender based or gender specific).tw.  
16 ((sex or gender) adj2 (difference\* or disparit\*)).tw.  
17 or/10-16  
18 9 and 17  
19 randomized controlled trial.pt.  
20 controlled clinical trial.pt.  
21 randomi?ed.ab.  
22 placebo.ab.  
23 clinical trials as topic.sh.  
24 randomly.ab.  
25 trial.ti.  
26 groups.ab.  
27 or/19-26  
28 9 and 27  
29 symptomatic.tw,kw.  
30 28 and 29  
31 18 and 27  
32 30 or 31  
33 limit 32 to yr="1990 -Current"  
34 case reports.pt.  
35 33 not 34  
**36 limit 35 to (english or french)**

**Supplemental Table II: Full List of Included Studies (n=27)**

| Study                                                                                           | Study Type | Interventions | Percent Stenosis          | Outcome Assessed                                                                                                                                                                                                                                                                                              |
|-------------------------------------------------------------------------------------------------|------------|---------------|---------------------------|---------------------------------------------------------------------------------------------------------------------------------------------------------------------------------------------------------------------------------------------------------------------------------------------------------------|
| North American Symptomatic Carotid Endarterectomy Trial Collaborators (NASCET)                  | RCT        | CEA / BMT     | 70-99%                    | - 2-year longitudinal collection of death and stroke events <sup>1</sup><br>- 8-year longitudinal collection of stroke events (disabling, ipsilateral) <sup>2</sup><br>- 5-year risk of ipsilateral stroke stratified by percent stenosis (sex-specific data available) <sup>3</sup>                          |
| European Carotid Surgery Trialists' Collaborative Group (ECST)                                  | RCT        | CEA / BMT     | 70-99%<br>0-29%           | - 30-day risk of death or disabling stroke <sup>4</sup><br>- 3-year longitudinal collection of death and stroke events <sup>4</sup><br>- 8-year longitudinal collection of death and stroke events <sup>5</sup><br>- Model of stroke-free life expectancy stratified by age and percent stenosis <sup>6</sup> |
| Carotid and Vertebral Artery Transluminal Angioplasty Study (CAVATAS)                           | RCT        | CEA / CAS     | 70-99%<br>50-69%<br>0-49% | - 30-day risk of death or disabling stroke <sup>7</sup><br>- 3-year longitudinal collection of death and stroke <sup>7</sup><br>- Sex-specific 8-year longitudinal collection of stroke events (disabling, TIA) and/or death <sup>8</sup>                                                                     |
| Stenting and Angioplasty with Protection in Patients at High Risk for Endarterectomy (SAPPHIRE) | RCT        | CEA / CAS     | > 50%*<br>> 80%†          | Death, stroke, myocardial infarction + Composite at 1 year <sup>9</sup>                                                                                                                                                                                                                                       |
| Stent-Supported Percutaneous Angioplasty of the Carotid Artery versus Endarterectomy (SPACE)    | RCT        | CEA / CAS     | > 50%                     | - 30-day risk of death, stroke, bleeding, or composite <sup>10</sup><br>- Sex-specific 30 day risk of composite outcome <sup>10</sup>                                                                                                                                                                         |

| Study                                                                                           | Study Type | Interventions | Percent Stenosis | Outcome Assessed                                                                                                                                                                                                                                                                                                                                                                                                                                                                                                                                                            |
|-------------------------------------------------------------------------------------------------|------------|---------------|------------------|-----------------------------------------------------------------------------------------------------------------------------------------------------------------------------------------------------------------------------------------------------------------------------------------------------------------------------------------------------------------------------------------------------------------------------------------------------------------------------------------------------------------------------------------------------------------------------|
|                                                                                                 |            |               |                  | <ul style="list-style-type: none"> <li>- 2-year risk of ipsilateral ischemic stroke plus 30-day risk of stroke and death<sup>11</sup></li> <li>- Sex-specific 2-year risk of ipsilateral ischemic stroke plus 30-day risk of stroke and death<sup>11</sup></li> <li>- Study aimed at identifying risk factors associated with outcome<sup>12</sup></li> </ul>                                                                                                                                                                                                               |
| Endarterectomy versus Angioplasty in Patients with Symptomatic Severe Carotid Stenosis (EVA-3S) | RCT        | CEA / CAS     | > 60%            | <ul style="list-style-type: none"> <li>- Stroke or death within 30 days of procedure and at 6 months<sup>13</sup></li> <li>- stroke or death within 30 days of procedure and at 4 years<sup>14</sup></li> <li>- Sex-specific 30-day risk of death, any stroke and 4 year risk of ipsilateral stroke (combined)<sup>14</sup></li> <li>- Stroke or death at 5 years and 10 years<sup>15</sup></li> </ul>                                                                                                                                                                      |
| Basel Carotid Artery Stenting Study (BACCAS)                                                    | RCT        | CEA / CAS     | > 70%            | <ul style="list-style-type: none"> <li>- 30-day risk of stroke, death, and myocardial infarction<sup>16</sup></li> <li>- patency of vessel after 2 years<sup>16</sup></li> </ul>                                                                                                                                                                                                                                                                                                                                                                                            |
| Carotid Revascularization Endarterectomy vs. Stenting Trial (CREST)                             | RCT        | CEA / CAS     | > 50%*<br>> 60%† | <ul style="list-style-type: none"> <li>- stroke, myocardial infarction, death within 30 days of randomization<sup>17</sup></li> <li>- ipsilateral stroke at 4 years<sup>17</sup></li> <li>- Sex-specific 30-day and 4 year risk of myocardial infarction, stroke, or death (composite and individual components)<sup>18</sup></li> <li>- Myocardial infarction, stroke, death and other adverse events during the periprocedural period<sup>19</sup></li> <li>- 30-day and/or 10-year risk stroke, myocardial infarction, death (composite outcome)<sup>20</sup></li> </ul> |

| Study                                                     | Study Type        | Interventions | Percent Stenosis | Outcome Assessed                                                                                                                                                                                                                                                                                                                                                                                                                                                     |
|-----------------------------------------------------------|-------------------|---------------|------------------|----------------------------------------------------------------------------------------------------------------------------------------------------------------------------------------------------------------------------------------------------------------------------------------------------------------------------------------------------------------------------------------------------------------------------------------------------------------------|
|                                                           |                   |               |                  | - Sex-specific 30-day and 10 year risk of primary composite outcome <sup>20</sup>                                                                                                                                                                                                                                                                                                                                                                                    |
| International Carotid Stenting Study (ICSS) Investigators | RCT               | CEA / CAS     | > 50%            | - 120-day risk of stroke, death, or myocardial infarction (composite) <sup>21</sup><br>- Sex-specific 120-day risk of the composite outcome <sup>21</sup><br>- 7-year longitudinal collection of stroke, death, or myocardial infarction events <sup>22</sup>                                                                                                                                                                                                        |
| NASCET and ECST                                           | IPD Meta-Analysis | CEA / BMT     | 0-99%            | - Risk of ipsilateral ischemic stroke, determined in relation to time from the last symptomatic event to randomization (sex-specific data available) <sup>23</sup><br>- 5-year risk of ipsilateral ischemic stroke and any stroke or death within 30 days of randomization [combined] <sup>24</sup><br>- 5-year risk of ipsilateral ischemic stroke and any stroke or death within 30 days of randomization [combined], stratified by percent stenosis <sup>24</sup> |
| EVA-3S, SPACE, ICSS, CREST trials                         | IPD Meta-Analysis | CEA / CAS     | Multiple         | Associations between perioperative and clinical variables and the 30-day risk of stroke or death <sup>25</sup><br>- Multiple outcomes assessed within 120 days and at 5 years <sup>26</sup><br>- Sex-specific outcomes of 120-day risk of any stroke or death                                                                                                                                                                                                        |

| Study                                     | Study Type        | Interventions | Percent Stenosis | Outcome Assessed                                                                                                                                                                                                                                                 |
|-------------------------------------------|-------------------|---------------|------------------|------------------------------------------------------------------------------------------------------------------------------------------------------------------------------------------------------------------------------------------------------------------|
|                                           |                   |               |                  | and 5-year risk of ipsilateral stroke (combined) <sup>26</sup><br>- Sex-specific outcome of 5 year risk of ipsilateral stroke <sup>26</sup>                                                                                                                      |
| EVA-3S, SPACE, BACASS, ICSS, CREST trials | IPD Meta-Analysis | CEA / CAS     | Multiple         | - Multiple outcomes assessed at 30 days after treatment (stroke, death, ipsilateral stroke, disabling stroke, myocardial infarction, restenosis etc.) <sup>27</sup><br>- Sex-Specific outcomes for death or any stroke within 30 days of treatment <sup>27</sup> |

CEA: Carotid endarterectomy; IPD: individual patient data; RCT: randomized controlled trial

\*Denotes Symptomatic Stenosis; †Denotes Asymptomatic Stenosis

**Supplemental Table III: Baseline Female Patient Characteristics of the Primary Studies**

|                     | ECST (1998) <sup>8</sup> | Rothwell et al. <sup>5</sup> | Alamowitch et al. <sup>9*</sup> | SPACE (2006) <sup>10</sup> | Eckstein et al. (SPACE) <sup>11</sup> | Mas et al. (EVA-3S) <sup>12</sup> | Ederle et al. (CAVATAS) <sup>13</sup> | ICSS <sup>14</sup> | Howard et al. (CREST) <sup>3</sup> | Brott et al. <sup>15</sup> | Brott et al. <sup>16</sup> | Muller et al. (2020) <sup>17</sup> |
|---------------------|--------------------------|------------------------------|---------------------------------|----------------------------|---------------------------------------|-----------------------------------|---------------------------------------|--------------------|------------------------------------|----------------------------|----------------------------|------------------------------------|
| n                   | 850                      | 1718                         | 1208                            | 334                        | 338                                   | 130                               | 152                                   | 503                | 872                                | 872                        | 1437                       | 1466                               |
| Age (years)         | NR                       | NR                           | 34.8%†                          | NR                         | NR                                    | NR                                | NR                                    | NR                 | 69.2 (9.2)                         | NR                         | NR                         | NR                                 |
| Hypertension        | NR                       | NR                           | 66.6%                           | NR                         | NR                                    | NR                                | NR                                    | NR                 | 88.3%                              | NR                         | NR                         | NR                                 |
| Diabetes            | NR                       | NR                           | 22.7%                           | NR                         | NR                                    | NR                                | NR                                    | NR                 | 31.6%                              | NR                         | NR                         | NR                                 |
| Dyslipidemia        | NR                       | NR                           | 42.0%                           | NR                         | NR                                    | NR                                | NR                                    | NR                 | 84.4%                              | NR                         | NR                         | NR                                 |
| Present Smoker      | NR                       | NR                           | 34.3%                           | NR                         | NR                                    | NR                                | NR                                    | NR                 | 27.7%                              | NR                         | NR                         | NR                                 |
| Previous TIA/Stroke | NR                       | NR                           | 18.1%                           | NR                         | NR                                    | NR                                | NR                                    | NR                 | NR                                 | NR                         | NR                         | NR                                 |
| 50%-69% Stenosis    | NR                       | NR                           | 24.2%                           | NR                         | NR                                    | NR                                | NR                                    | NR                 | NR                                 | NR                         | NR                         | NR                                 |
| >70% Stenosis       | NR                       | NR                           | 41.8%                           | NR                         | NR                                    | NR                                | NR                                    | NR                 | NR                                 | NR                         | NR                         | NR                                 |

NR: not reported

\*Baseline patient characteristics for NASCET and ACE trials reported together

†Reported “Age older than 70 years” in percent

**References:**

1. Beneficial Effect of Carotid Endarterectomy in Symptomatic Patients with High-Grade Carotid Stenosis. *N. Engl. J. Med.* [Internet]. 1991;325:445–453. Available from: <http://www.nejm.org/doi/abs/10.1056/NEJM199108153250701>
2. Barnett HJM, Taylor DW, Eliasziw M, Fox AJ, Ferguson GG, Haynes RB, Rankin RN, Clagett GP, Hachinski VC, Sackett DL, et al. Benefit of Carotid Endarterectomy in Patients with Symptomatic Moderate or Severe Stenosis. *N. Engl. J. Med.* [Internet]. 1998;339:1415–1425. Available from: <http://www.nejm.org/doi/abs/10.1056/NEJM199811123392002>
3. Alamowitch S, Eliasziw M, Barnett HJM. The Risk and Benefit of Endarterectomy in Women With Symptomatic Internal Carotid Artery Disease. *Stroke* [Internet]. 2005;36:27–31. Available from: <https://www.ahajournals.org/doi/10.1161/01.STR.0000149622.12636.1f>
4. Warlow C. MRC European Carotid Surgery Trial: interim results for symptomatic patients with severe (70-99%) or with mild (0-29%) carotid stenosis. *Lancet* [Internet]. 1991;337:1235–1243. Available from: <https://linkinghub.elsevier.com/retrieve/pii/014067369192916P>
5. Endarterectomy for moderate symptomatic carotid stenosis: interim results from the MRC European Carotid Surgery Trial. *Lancet (London, England)* [Internet]. 1996;347:1591–3. Available from: <http://www.ncbi.nlm.nih.gov/pubmed/8667868>
6. European Carotid Surgery Trialists' Collaborative Group. Randomised trial of endarterectomy for recently symptomatic carotid stenosis: final results of the MRC European Carotid Surgery Trial (ECST). *Lancet*. 1998;351:1379–1387.
7. Investigators C. Endovascular versus surgical treatment in patients with carotid stenosis in the Carotid and Vertebral Artery Transluminal Angioplasty Study (CAVATAS): a randomised trial. *Lancet*. 2001;357:1729–1737.
8. Ederle J, Bonati LH, Dobson J, Featherstone RL, Gaines PA, Beard JD, Venables GS, Markus HS, Clifton A, Sandercock P, et al. Endovascular treatment with angioplasty or stenting versus endarterectomy in patients with carotid artery stenosis in the Carotid And Vertebral Artery Transluminal Angioplasty Study (CAVATAS): long-term follow-up of a randomised trial. *Lancet Neurol.* [Internet]. 2009;8:898–907. Available from: <https://linkinghub.elsevier.com/retrieve/pii/S1474442209702285>
9. Yadav JS, Wholey MH, Kuntz RE, Fayad P, Katzen BT, Mishkel GJ, Bajwa TK, Whitlow P, Strickman NE, Jaff MR, et al. Protected Carotid-Artery Stenting versus Endarterectomy in High-Risk Patients. *N. Engl. J. Med.* [Internet]. 2004;351:1493–1501. Available from: <http://www.nejm.org/doi/abs/10.1056/NEJMoa040127>
10. 30 day results from the SPACE trial of stent-protected angioplasty versus carotid endarterectomy in symptomatic patients: a randomised non-inferiority trial. *Lancet* [Internet]. 2006;368:1239–1247. Available from: <https://linkinghub.elsevier.com/retrieve/pii/S0140673606691228>
11. Eckstein H-H, Ringleb P, Allenberg J-R, Berger J, Fraedrich G, Hacke W, Hennerici M, Stingele R, Fiehler J, Zeumer H, et al. Results of the Stent-Protected Angioplasty versus Carotid Endarterectomy (SPACE) study to treat symptomatic stenoses at 2 years: a multinational, prospective, randomised trial. *Lancet Neurol.* [Internet]. 2008;7:893–902. Available from: <https://linkinghub.elsevier.com/retrieve/pii/S1474442208701960>

12. Stinge R, Berger J, Alfke K, Eckstein H-H, Fraedrich G, Allenberg J, Hartmann M, Ringleb PA, Fiehler J. Clinical and angiographic risk factors for stroke and death within 30 days after carotid endarterectomy and stent-protected angioplasty: a subanalysis of the SPACE study. *Lancet Neurol*. [Internet]. 2008;7:216–222. Available from: <https://linkinghub.elsevier.com/retrieve/pii/S1474442208700243>
13. Mas J-L, Chatellier G, Beyssen B, Branchereau A, Moulin T, Becquemin J-P, Larrue V, Lièvre M, Leys D, Bonneville J-F, et al. Endarterectomy versus Stenting in Patients with Symptomatic Severe Carotid Stenosis. *N. Engl. J. Med.* [Internet]. 2006;355:1660–1671. Available from: <http://www.nejm.org/doi/abs/10.1056/NEJMoa061752>
14. Mas J-L, Trinquart L, Leys D, Albucher J-F, Rousseau H, Viguier A, Bossavy J-P, Denis B, Piquet P, Garnier P, et al. Endarterectomy Versus Angioplasty in Patients with Symptomatic Severe Carotid Stenosis (EVA-3S) trial: results up to 4 years from a randomised, multicentre trial. *Lancet Neurol*. [Internet]. 2008;7:885–892. Available from: <https://linkinghub.elsevier.com/retrieve/pii/S1474442208701959>
15. Mas J-L, Arquizan C, Calvet D, Viguier A, Albucher J-F, Piquet P, Garnier P, Viader F, Giroud M, Hosseini H, et al. Long-Term Follow-Up Study of Endarterectomy Versus Angioplasty in Patients With Symptomatic Severe Carotid Stenosis Trial. *Stroke* [Internet]. 2014;45:2750–2756. Available from: <https://www.ahajournals.org/doi/10.1161/STROKEAHA.114.005671>
16. Hoffmann A, Engelter S, Taschner C, Mendelowitsch A, Merlo A, Radue E-W, Lyrer P KE. Carotid artery stenting versus carotid endarterectomy—a prospective randomised controlled single-centre trial with long-term follow-up (BACASS). *Schweiz Arch Neurol Psychiatr*. 2008;159:84–89.
17. Brott TG, Hobson RW, Howard G, Roubin GS, Clark WM, Brooks W, Mackey A, Hill MD, Leimgruber PP, Sheffet AJ, et al. Stenting versus Endarterectomy for Treatment of Carotid-Artery Stenosis. *N. Engl. J. Med.* [Internet]. 2010;363:11–23. Available from: <http://www.nejm.org/doi/abs/10.1056/NEJMoa0912321>
18. Howard VJ, Lutsep HL, Mackey A, Demaerschalk BM, Sam AD, Gonzales NR, Sheffet AJ, Voeks JH, Meschia JF, Brott TG. Influence of sex on outcomes of stenting versus endarterectomy: a subgroup analysis of the Carotid Revascularization Endarterectomy versus Stenting Trial (CREST). *Lancet Neurol*. [Internet]. 2011;10:530–537. Available from: <https://linkinghub.elsevier.com/retrieve/pii/S1474442211700801>
19. Silver FL, Mackey A, Clark WM, Brooks W, Timaran CH, Chiu D, Goldstein LB, Meschia JF, Ferguson RD, Moore WS, et al. Safety of Stenting and Endarterectomy by Symptomatic Status in the Carotid Revascularization Endarterectomy Versus Stenting Trial (CREST). *Stroke* [Internet]. 2011;42:675–680. Available from: <https://www.ahajournals.org/doi/10.1161/STROKEAHA.110.610212>
20. Brott TG, Howard G, Roubin GS, Meschia JF, Mackey A, Brooks W, Moore WS, Hill MD, Mantese VA, Clark WM, et al. Long-Term Results of Stenting versus Endarterectomy for Carotid-Artery Stenosis. *N. Engl. J. Med.* [Internet]. 2016;374:1021–1031. Available from: <http://www.nejm.org/doi/10.1056/NEJMoa1505215>
21. Carotid artery stenting compared with endarterectomy in patients with symptomatic carotid stenosis (International Carotid Stenting Study): an interim analysis of a randomised controlled trial. *Lancet* [Internet]. 2010;375:985–997. Available from: <https://linkinghub.elsevier.com/retrieve/pii/S0140673610602395>
22. Bonati LH, Dobson J, Featherstone RL, Ederle J, van der Worp HB, de Borst GJ, Mali

- WPTM, Beard JD, Cleveland T, Engelter ST, et al. Long-term outcomes after stenting versus endarterectomy for treatment of symptomatic carotid stenosis: the International Carotid Stenting Study (ICSS) randomised trial. *Lancet* [Internet]. 2015;385:529–538. Available from: <https://linkinghub.elsevier.com/retrieve/pii/S0140673614611843>
23. Rothwell PM, Eliasziw M, Gutnikov SA, Warlow CP, Barnett HJM. Sex Difference in the Effect of Time From Symptoms to Surgery on Benefit From Carotid Endarterectomy for Transient Ischemic Attack and Nondisabling Stroke. *Stroke* [Internet]. 2004;35:2855–2861. Available from: <https://www.ahajournals.org/doi/10.1161/01.STR.0000147040.20446.f6>
24. Rothwell PM, Eliasziw M, Gutnikov SA, Warlow CP, Barnett HJM, Carotid Endarterectomy Trialists Collaboration. Endarterectomy for symptomatic carotid stenosis in relation to clinical subgroups and timing of surgery. *Lancet (London, England)*. 2004;363:915–24.
25. Knappich C, Kuehnl A, Haller B, Salvermoser M, Algra A, Becquemin J-P, Bonati LH, Bulbulia R, Calvet D, Fraedrich G, et al. Associations of Perioperative Variables With the 30-Day Risk of Stroke or Death in Carotid Endarterectomy for Symptomatic Carotid Stenosis. *Stroke* [Internet]. 2019;50:3439–3448. Available from: <https://www.ahajournals.org/doi/10.1161/STROKEAHA.119.026320>
26. Brott TG, Calvet D, Howard G, Gregson J, Algra A, Becquemin J-P, de Borst GJ, Bulbulia R, Eckstein H-H, Fraedrich G, et al. Long-term outcomes of stenting and endarterectomy for symptomatic carotid stenosis: a preplanned pooled analysis of individual patient data. *Lancet Neurol.* [Internet]. 2019;18:348–356. Available from: <https://linkinghub.elsevier.com/retrieve/pii/S1474442219300286>
27. Müller MD, Lyrer P, Brown MM, Bonati LH. Carotid artery stenting versus endarterectomy for treatment of carotid artery stenosis. *Cochrane database Syst. Rev.* [Internet]. 2020;2:CD000515. Available from: <http://www.ncbi.nlm.nih.gov/pubmed/32096559>
